# Supplementary material for: Telomere dysfunction implicates POT1 in patients with idiopathic pulmonary fibrosis
Source: PubMed Central journal article supplement (PMC9014792; doi:10.1084/jem.20211681), 2022-04-14

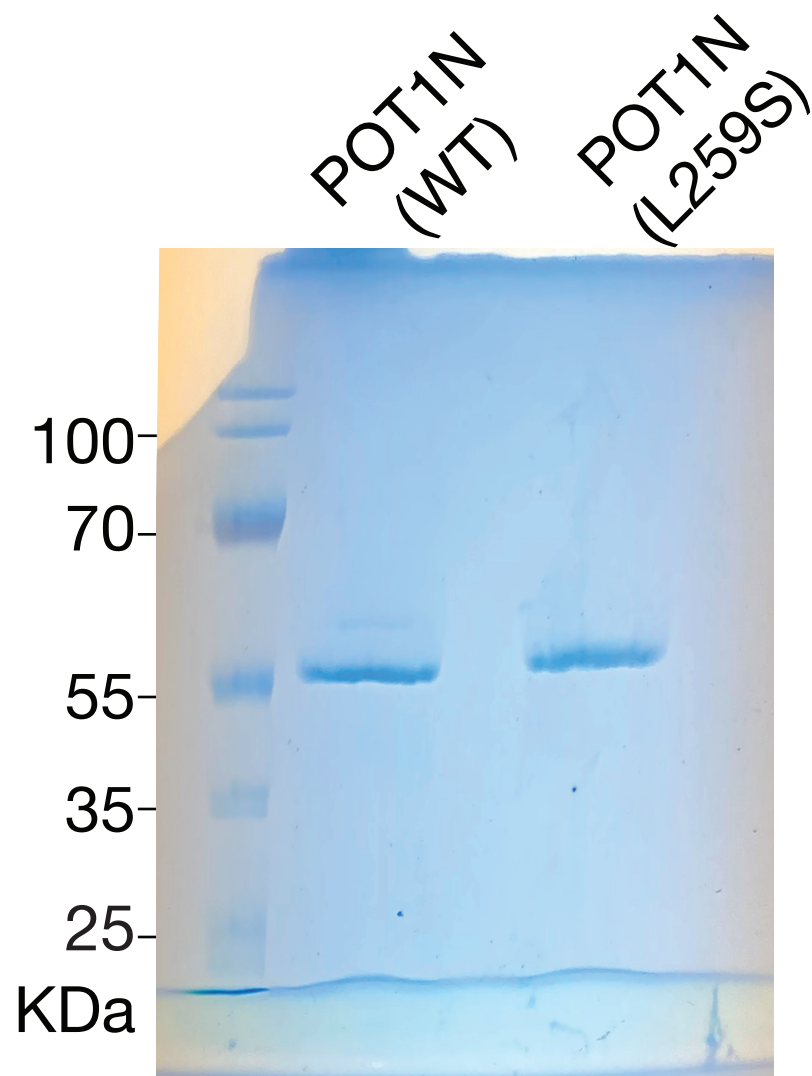

Supplement: JEM_20211681_SourceDataF2.pdf [file JEM_20211681_SourceDataF2.pdf]
