# Supplementary material for: Telomere dysfunction implicates POT1 in patients with idiopathic pulmonary fibrosis
Source: PubMed Central journal article supplement (PMC9014792; doi:10.1084/jem.20211681), 2022-04-14
Supplement: JEM_20211681_SourceDataF6.pdf [file JEM_20211681_SourceDataF6.pdf]

Native  
Single-Stranded TTAGGG

Denatured  
Total TTAGGG

WT  
L259S  
+

WT  
L259S  
-

WT  
L259S  
+

WT  
L259S  
-

Exo1

kb  
20-  
10-  
5-  
4-  
3-

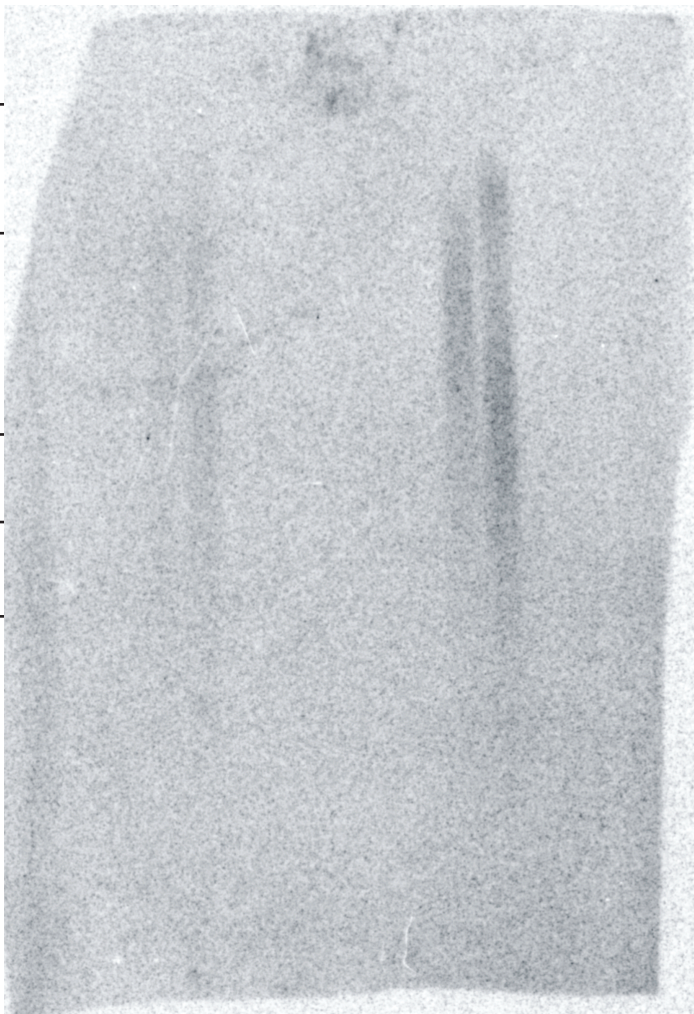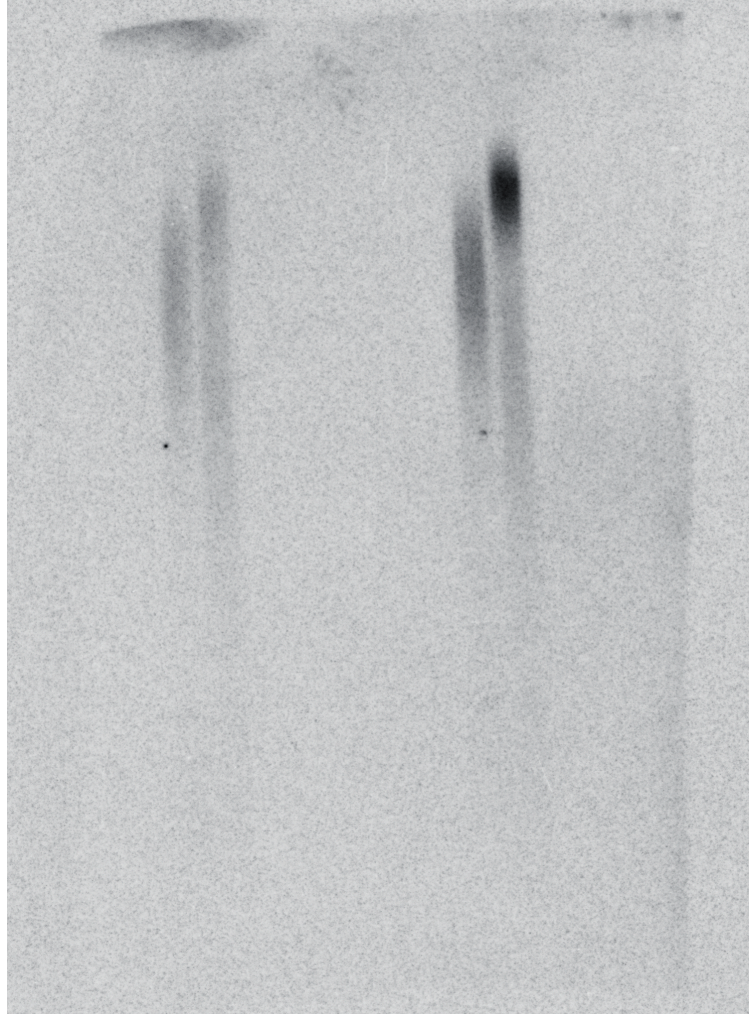

0.00  
0.07  
1.00  
1.10  
Relative normalized  
TTAGGG
